# Supplementary material
Source: Springer Nature journal article supplement (https://www.springermedizin.de/resource/supplementary/12888_2013_1440_MOESM4_ESM.pdf/9480218)
Supplement: MOESM4 [file 9480218]

**Additional File 4. Rate of Events: Covariate-Adjusted Poisson or Negative Binomial Regression Results, by Study Period**

| Event Setting                                            | Study Period <sup>a</sup>         |        |                    |                                    |        |       |                                    |        |       |                                    |        |                    |
|----------------------------------------------------------|-----------------------------------|--------|--------------------|------------------------------------|--------|-------|------------------------------------|--------|-------|------------------------------------|--------|--------------------|
|                                                          | 121-180 Days<br>(vs. 61-120 Days) |        |                    | 181-240 Days<br>(vs. 121-180 Days) |        |       | 241-300 Days<br>(vs. 181-240 Days) |        |       | 301-364 Days<br>(vs. 241-300 Days) |        |                    |
|                                                          | IRR <sup>b</sup>                  | 95% CI |                    | IRR <sup>b</sup>                   | 95% CI |       | IRR <sup>b</sup>                   | 95% CI |       | IRR <sup>b</sup>                   | 95% CI |                    |
| Number of total medical encounters                       | 0.982                             | 0.959  | 1.006              | 1.002                              | 0.978  | 1.026 | 1.005                              | 0.980  | 1.030 | 1.085                              | 1.059  | 1.112 <sup>c</sup> |
| Number of schizophrenia-related total medical encounters | 1.006                             | 0.973  | 1.040              | 0.986                              | 0.951  | 1.022 | 0.988                              | 0.949  | 1.028 | 1.071                              | 1.029  | 1.114 <sup>c</sup> |
| Number of prescription claims                            | 0.968                             | 0.941  | 0.995 <sup>c</sup> | 0.996                              | 0.968  | 1.025 | 1.008                              | 0.979  | 1.037 | 1.074                              | 1.044  | 1.105 <sup>c</sup> |
| Number of schizophrenia-related prescription claims      | 0.958                             | 0.929  | 0.988 <sup>c</sup> | 0.974                              | 0.945  | 1.005 | 0.995                              | 0.966  | 1.026 | 1.077                              | 1.042  | 1.112              |
| Number of ED visits                                      | 0.998                             | 0.888  | 1.122              | 0.940                              | 0.836  | 1.056 | 1.001                              | 0.889  | 1.128 | 1.024                              | 0.908  | 1.155              |
| Number of schizophrenia-related ED visits                | 1.009                             | 0.790  | 1.288              | 0.890                              | 0.670  | 1.184 | 0.877                              | 0.642  | 1.197 | 0.785                              | 0.556  | 1.110              |
| Number of office visits                                  | 1.024                             | 0.974  | 1.077              | 0.992                              | 0.945  | 1.042 | 1.027                              | 0.974  | 1.082 | 1.089                              | 1.035  | 1.146 <sup>c</sup> |
| Number of schizophrenia-related office visits            | 1.112                             | 1.007  | 1.228 <sup>c</sup> | 0.956                              | 0.874  | 1.045 | 1.061                              | 0.962  | 1.171 | 1.034                              | 0.930  | 1.151              |
| Number of outpatient visits                              | 0.913                             | 0.837  | 0.996 <sup>c</sup> | 0.971                              | 0.884  | 1.067 | 0.950                              | 0.857  | 1.054 | 1.106                              | 1.002  | 1.221 <sup>c</sup> |
| Number of schizophrenia-related outpatient visits        | 0.911                             | 0.774  | 1.072              | 0.908                              | 0.739  | 1.117 | 0.853                              | 0.653  | 1.112 | 0.982                              | 0.796  | 1.211              |
| Number of inpatient admissions                           | 0.961                             | 0.826  | 1.117              | 0.955                              | 0.817  | 1.116 | 0.958                              | 0.822  | 1.115 | 1.020                              | 0.869  | 1.196              |

| Event Setting                                             | Study Period <sup>a</sup>         |        |       |                                    |        |       |                                    |        |       |                                    |        |                    |
|-----------------------------------------------------------|-----------------------------------|--------|-------|------------------------------------|--------|-------|------------------------------------|--------|-------|------------------------------------|--------|--------------------|
|                                                           | 121-180 Days<br>(vs. 61-120 Days) |        |       | 181-240 Days<br>(vs. 121-180 Days) |        |       | 241-300 Days<br>(vs. 181-240 Days) |        |       | 301-364 Days<br>(vs. 241-300 Days) |        |                    |
|                                                           | IRR <sup>b</sup>                  | 95% CI |       | IRR <sup>b</sup>                   | 95% CI |       | IRR <sup>b</sup>                   | 95% CI |       | IRR <sup>b</sup>                   | 95% CI |                    |
| Number of schizophrenia-related inpatient admissions      | 0.937                             | 0.785  | 1.118 | 0.885                              | 0.738  | 1.062 | 0.926                              | 0.769  | 1.116 | 0.984                              | 0.802  | 1.207              |
| Number of ancillary care encounters                       | 0.996                             | 0.960  | 1.033 | 1.014                              | 0.977  | 1.052 | 1.006                              | 0.967  | 1.046 | 1.095                              | 1.057  | 1.135 <sup>c</sup> |
| Number of schizophrenia-related ancillary care encounters | 1.031                             | 0.975  | 1.089 | 1.011                              | 0.952  | 1.073 | 0.993                              | 0.930  | 1.060 | 1.076                              | 1.016  | 1.140 <sup>c</sup> |

CI = confidence interval; IRR = incidence rate ratio; ED = emergency department.

<sup>a</sup> 12-month period following the index discharge date defines the postindex period.

<sup>b</sup> Incidence rate ratio based on negative binomial or Poisson regression model, adjusted for study period and other covariates (i.e., gender, race, age, Charlson Comorbidity Index score, plan type, discharge status, antipsychotic adherence, preindex period health care cost).

<sup>c</sup> Significant at level 0.05.
